# Supplementary material
Source: Springer Nature journal article supplement (https://www.springermedizin.de/resource/supplementary/12876_2012_925_MOESM1_ESM.pdf/9438054)

**A**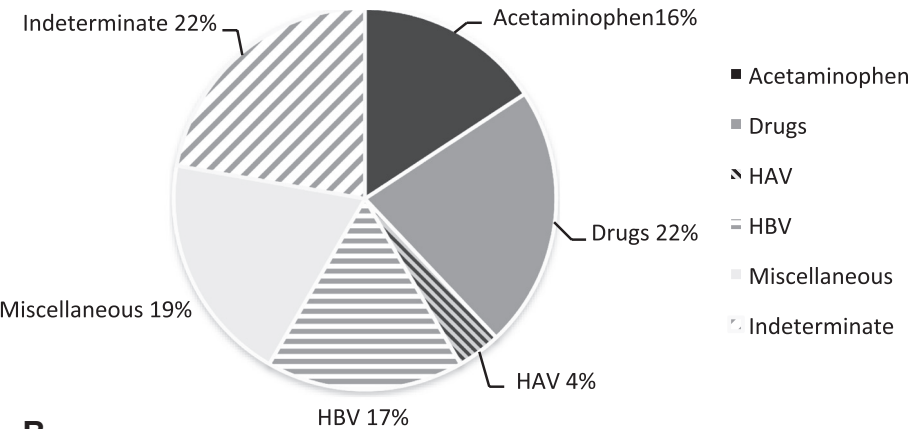**B**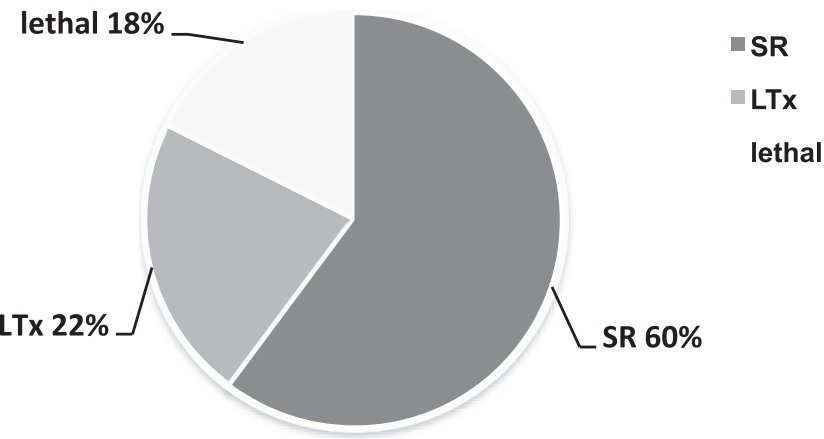

Supplement: MOESM1 [file 9438054]
